# Supplementary material
Source: publisher site journal article supplement (https://www.dovepress.com/article/529615)
Supplement: Supplementary file 1 [file 529615-Supplementary-Material.doc]

**Supplementary file 1** Interview guide.

**Interview Guide**

**Welcome:** Good morning/afternoon. My name is _________ and I’m here to facilitate today’s discussion. I appreciate you taking the time to share your opinions and experiences with us. We will talk for about an hour. Feel free to leave at any time if you need to.

**Introduction:** We will discuss barriers Chinese Americans may face when seeking mental health services. We plan to develop a program that supports the mental health and well-being of people like you, so we’d like to hear your thoughts. Would it be okay if I recorded the discussion? (If yes, switch on the recorder)

**Anonymity:** Despite being taped, I assure you that the discussion will remain anonymous. The tapes will be kept safely in a locked facility until they are transcribed word for word, then destroyed. The interview transcripts will contain no information that would link your name or identity to specific statements. Try to answer and comment as accurately and truthfully as possible. Questions and discussions are not mandatory and so you may decide for yourself which portions you would like to answer and/or participate in.

1. When you hear the term “mental health,” what comes to mind?
2. Have you ever felt sad or down or lacked interest in things you typically enjoy over a consistent period of time (e.g., for two weeks or longer) in the past?

-If yes, probe: can you tell me more about it? (e.g., did you notice any other things during that time? Appetite changes? Fatigue? Feeling worthless on the inside? Or bad about how you look outside? Difficulty concentrating?)

Did you seek mental health help?

-If yes, probe: What motivated you? Where did you go? What happened as a result of your seeking care? What do you think of the services?

-If no, probe: Why? What are some barriers/reasons?

3. When you are feeling sad or down, what do you normally do to make you feel better?

4. What is it like to live with diabetes? Does living with diabetes affect your mood or feelings? How?

5. Are you aware that depression is very common in people with diabetes? What comes to mind when you hear the word depression?

6. Have you ever heard of mindfulness? What comes to your mind when you hear this word?

7. Would you be interested in learning about mindfulness for reducing stress?

8. Who do you feel comfortable talking to about your feelings or mental health? Why?

9. Have you ever talked to your families or friends about your feelings or mental health?

10.Are there any people in your life who you avoid talking about your feelings or mental health?

- If yes, who are they? Why do you avoid talking to them about your feelings or mental health?

11. Has your family doctor/primary care doctor ever asked about your mental health/feelings/coping with diabetes management?

- How did you feel about talking with them about it?

12. Are there any factors in Chinese culture that prevent you from seeking mental help?

13. Are there any factors in Chinese culture that motivate you to seek mental help?

14. Are there any mental health services available in your community? If yes, what are they? What do you think of them?

15. What kind of mental health support is missing in your community? What can be improved?

16. What can we do to encourage people to seek mental health support when they need it?

17. How easy or difficult is it for someone in your community to get mental health care if they need it?

- What makes it easier for people to access these services? What helps them to seek care?
- What makes it difficult?
- Are there enough doctors/ counselors available?
- Do people know where to go?
- Language barriers?
- Cultural barriers?
- Financial challenges

-If yes, probe:

1. How do people pay for these services?

b. What do people do if they cannot pay out of pocket?

- Access to care (e.g., no insurance; no transportation to doctor’s office)

18. How would you like to receive mental health support?

- individual vs group with people like you who also need mental health support.
- in-person vs phone calls vs video calls.

19. One of the nice things about WeChat is that we can create groups within WeChat. If we are going to create a small group of 6-8 Chinese immigrants like you who are trying to control their diabetes and reduce stress, we will send brief videos and encourage members to support each other. Would you be interested in joining this kind of group?

20. What other support would you be interested in?

**Concluding question**

- Of all the topics we’ve discussed today, which is (are) the most important one(s) you would like to express about your mental health and wellbeing?

**Conclusion**

- Thank you for participating. This discussion has been very successful.
- Your opinions will be of a great value to this study.
- We hope you have enjoyed the discussion.
- If there is anything you are unhappy with or wish to complain about, please let me know later.
- I would like to remind you that we will keep all comments you make in this report anonymous.
